# Supplementary material for: Status Epilepticus and Neurosyphilis: A Case Report and a Narrative Review
Source: MDPI journal article supplement (doi:10.3390/neurosci2040031), 2021-12-01
Supplement: s1 [file s1]

**Supplementary Table 1.** Demographic, clinical, EEG, MRI, CSF and follow-up characteristics of patients presenting Status Epilepticus as an expression of Neurosyphilis.

| Study                   | N of patients | Gender | Age | Clinical Presentation                            | New onset SE | Syphilis diagnosed at SE presentation | Immuno-compromised | EEG                                         | Neuroimaging         | CSF                                                                                                                                                                                        | SE Treatment  | Response     | Outcome                                                 |
|-------------------------|---------------|--------|-----|--------------------------------------------------|--------------|---------------------------------------|--------------------|---------------------------------------------|----------------------|--------------------------------------------------------------------------------------------------------------------------------------------------------------------------------------------|---------------|--------------|---------------------------------------------------------|
| Lo Vecchio et al., 1994 | 1             | F      | 52  | Rapid onset progressive dementia then GCSE       | yes          | yes                                   | no                 | focal spikes, sharp waves and LPDs          | diffuse atrophy      | WBC: 35 (lymphocytes 95%), RBC: 6, protein: 79 mg/dL, glucose: 132 mg/dL. Gram stain, bacterial antigens, Toxoplasmosis, india ink, and bacterial and fungal cultures: negative. VDRL 1:4. | DZP, LZP, PHT | RSE          | Improvement: dementia improved, no seizures             |
| Heald et al., 1996      | 1             | M      | 43  | Alteration of mood and behavior then NCSE (CPSE) | yes          | yes                                   | no                 | right T LPDs                                | diffuse atrophy      | Increased protein content (0.8 g/l), normal glucose (3.6 mmol/L) no pleocytosis. TPHA 1:2560; VDRL, FTA-ABD positive                                                                       | PHT, CBZ      | Reponsive SE | Recovery                                                |
| Perri et al., 1996      | 1             | M      | 45  | NCSE (CPSE)                                      | yes          | yes                                   | N/R                | sharp-wave discharges on the anterior areas | N/R                  | Syphilis tests positive                                                                                                                                                                    | AEDs          | Reponsive SE | Improvement: incomplete recovery with memory impairment |
| Suarez et al., 1996     | 1             | M      | 47  | FMSE                                             | yes          | yes                                   | no                 | L F slowing                                 | L F syphilitic gumma | Protein: 117 mg/dl, glucose: 69 mg/dl, WBC of 11 mm <sup>3</sup> (82% lymphocytes and 18% polymorphonuclear cells). No red cells. VDRL 1:2. Cultures negative.                             | PHT           | Reponsive SE | Improvement                                             |
| Rinkel et al., 1997     | 1             | M      | 40  | epilepsy, a previous                             | no           | yes                                   | no                 | N/R                                         | Diffuse atrophy and  | leucocytosis and increased protein content                                                                                                                                                 | N/R           | N/R          | Disorientation,                                         |

|                            |   |   |     |                                                           |     |     |     |                             |                                                                                                                                             |                                                                                                                                  |                    |              |                                                                               |
|----------------------------|---|---|-----|-----------------------------------------------------------|-----|-----|-----|-----------------------------|---------------------------------------------------------------------------------------------------------------------------------------------|----------------------------------------------------------------------------------------------------------------------------------|--------------------|--------------|-------------------------------------------------------------------------------|
|                            |   |   |     | GCSE, drowsiness and confusion. Admitted for another GCSE |     |     |     |                             | periventricular white matters lesions                                                                                                       |                                                                                                                                  |                    |              | hemianopia, cerebellar ataxia, anisocoria, dysarthria progressively recovered |
| Primavera et al., 1998     | 1 | M | 44  | minimal personality changes then NCSE (CPSE)              | yes | yes | no  | left emispheric LPDs and ED | multiple subcortical small ischemic lesions                                                                                                 | Pleocytosis (cell count, 72/mm <sup>3</sup> ) and elevated protein (1.07 g/L). VDRL 1:1, TPHA 1:128.                             | CLZ and anesthesia | RSE          | Improvement: memory impairment                                                |
| Thomas et al., 1999        | 1 | M | 47  | disinhibition, hypomanic state, NCSE                      | yes | yes | N/R | F right LPDs and seizures   | atrophy                                                                                                                                     | N/R                                                                                                                              | BDZ, CBZ           | Reponsive SE | Improvement: mild subcortical dementia                                        |
| Lauria et al., 2001        | 1 | M | 62  | previous development of aphasia then NCSE (CPSE)          | yes | yes | no  | N/R                         | hyperintensity in the R gyrus cinguli, inferior frontal lobe, temporal lobe, insula, amygdala, hippocampus, and head of the caudate nucleus | 5 lymphocytes per milliliter. Intrathecal IgG synthesis, VDRL and FTA-ABS positive. TPHA 1:2048. HSV1-2 negative.                | CBZ                | Reponsive SE | Improvement                                                                   |
| Camacho-Salas et al., 2002 | 1 | M | N/R | GCSE, confusion and aphasia                               | yes | yes | N/R | L FT LPDs                   | L T stroke                                                                                                                                  | positive luetic test                                                                                                             | PHT                | Reponsive SE | Improvement of language disorder                                              |
| Jirsch et al., 2002        | 1 | M | 44  | GCSE-FMSE                                                 | yes | yes | no  | L posterior LPDs            | L-sylvian region arachnoid cyst                                                                                                             | pleocytosis (WBC count, 22/mm <sup>3</sup> , 15/mm <sup>3</sup> mononuclear cells) and elevated protein (1.2 g/L). VDRL positive | LZP, PHT, PB, PRO  | RSE          | Severe disability: global aphasia and short-term memory problems,             |

|                       |   |   |    |                                                                                    |     |     |    |                                       |                                       |                                                                                                                                                                                |                              |              |                                                                                                     |
|-----------------------|---|---|----|------------------------------------------------------------------------------------|-----|-----|----|---------------------------------------|---------------------------------------|--------------------------------------------------------------------------------------------------------------------------------------------------------------------------------|------------------------------|--------------|-----------------------------------------------------------------------------------------------------|
|                       |   |   |    |                                                                                    |     |     |    |                                       |                                       |                                                                                                                                                                                |                              |              | seizures free                                                                                       |
| Vojvodic et al., 2003 | 1 | M | 45 | 3 episodes of NCSE (CPSE)                                                          | no  | yes | no | delta activities over both FT regions | bi-T hyperintensities                 | Mononuclear pleocytosis (9/mm <sup>3</sup> ), increased protein (0.53 g/L), presence of oligoclonal bands. VDRL positive.                                                      | CBZ (third episodes with PB) | Reponsive SE | Complete recovery                                                                                   |
| Ubogu et al., 2003    | 1 | M | 44 | epilepsy and previous SE and FTD related to already diagnosed syphilis GCSE - NCSE | no  | no  | no | L F LPDs                              | Diffuse atrophy                       | N/R                                                                                                                                                                            | LZP, PHT, VPA, LTG, PRO, KET | SRSE         | Severe disability: persistent global aphasia and ataxia; nonambulatory. No other seizures.          |
| Ances BM et al., 2004 | 1 | M | 41 | GCSE - NCSE                                                                        | yes | yes | no | LPDs and seizures L and R T           | L T hyperintensity and bi-T atrophy   | elevated opening pressure (38mmHg), elevated protein (1.17 g/L), elevated glucose (89 mg/dL), pleocytosis (43WBC/mm <sup>3</sup> ), negative viruses, VDRL: 1:16.              | LZP, PHT, PB                 | RSE          | Severe disability: physical and mental sequelae (emotional lability, amnesia, low limbs spasticity) |
| Marano et al., 2004   | 1 | M | 48 | NCSE (CPSE)                                                                        | yes | yes | no | N/R                                   | R FT hyperintensity                   | Normal glucose, 12 lymphocytes/mm <sup>3</sup> , proteins: 63 mg/dL, positive Link's index (3.5), 5 IgG oligoclonal bands, positive VDRL, Mycobacteria, cryptococcus, HSV 1-2. | CBZ                          | Reponsive SE | N/R                                                                                                 |
| Chang et al., 2006    | 1 | M | 51 | fever, memory impairment,                                                          | yes | yes | no | R FT sharp waves                      | R FT hyperintensity and hydrocephalus | Elevated opening pressure (220 mm H <sub>2</sub> O), pleocytosis (41 leukocytes/uL), glucose level: 76 mg/dL, elevated                                                         | LZP, PTH, VPA                | Reponsive SE | Improve ment except for mild amnesia                                                                |

|                                 |   |   |    |                                                                                                          |     |     |    |                                                                                                                                   |                                                                                                                                                            |                                                                                                                                                                                                                                   |                               |                 |                                                          |
|---------------------------------|---|---|----|----------------------------------------------------------------------------------------------------------|-----|-----|----|-----------------------------------------------------------------------------------------------------------------------------------|------------------------------------------------------------------------------------------------------------------------------------------------------------|-----------------------------------------------------------------------------------------------------------------------------------------------------------------------------------------------------------------------------------|-------------------------------|-----------------|----------------------------------------------------------|
|                                 |   |   |    | general<br>malaise then<br>GCSE - FCSE                                                                   |     |     |    |                                                                                                                                   |                                                                                                                                                            | protein (101 mg/dL),<br>VDRL: 1:32, negative HSV<br>and cryptococcal antigen                                                                                                                                                      |                               |                 |                                                          |
| Li et al.,<br>2006              | 1 | M | 41 | GCSE                                                                                                     | yes | yes | no | diffuse<br>slowing<br>(under<br>MZM<br>infusion)                                                                                  | hyperintensity<br>in the L<br>cingulate gyrus,<br>T lobe<br>and peri-<br>rolandic area                                                                     | Mild pleocytosis (WBC,<br>25/mm <sup>3</sup> ;<br>PMN/Mono=5/95%), high<br>protein level (120mg/dL),<br>normal glucose ratio.<br>VDRL positive. HSV,<br>tuberculosis and fungi<br>negative.                                       | DZP, LZP,<br>PHT, MZM         | RSE             | Improve<br>ment:<br>retrograde<br>amnesia                |
| Boursouli<br>an et al.,<br>2007 | 1 | M | 51 | NCSE (CPSE)                                                                                              | yes | yes | no | Bi-<br>hemispher<br>ic delta<br>slow<br>waves<br>with R<br>mid-<br>posterior<br>T LPDs<br>with<br>frequent<br>ictal<br>discharges | leptomeningeal<br>enhancement<br>over the right<br>cerebral<br>hemisphere<br>Second MRI:<br>extensive<br>increased signal<br>in the right<br>temporal lobe | 33 WBC/ $\mu$ L, protein 110<br>mg/dL, glucose<br>76 mg/dL and positive<br>VDRL: 1:4 titre.                                                                                                                                       | PHT, VPA,<br>LEV              | Reponsive<br>SE | Improve<br>ment:<br>major<br>cognitive<br>impairme<br>nt |
| Gurses et<br>al., 2007          | 2 | M | 42 | progressive<br>memory<br>impairment,<br>apathy/depres<br>sion and<br>speech<br>difficulties<br>then FMSE | yes | yes | no | R anterior<br>T LPDs                                                                                                              | bilateral anterior<br>and medial T<br>hyperintensity<br>and diffuse<br>cortical atrophy                                                                    | lymphocytic pleocytosis<br>(22 lymphocytes/mm <sup>3</sup> , 2<br>polymorphonuclear<br>leucocytes/mm <sup>3</sup> ), high<br>protein content (134<br>mg/dL).<br>Glucose: 80 mg/dL.<br>VDRL and TPHA positive.<br>HSV<br>negative. | DZP, PHT,<br>CBZ              | Reponsive<br>SE | Complete<br>recovery                                     |
|                                 |   | M | 44 | FMSE                                                                                                     | yes | yes | no | L<br>posterior<br>LPDs                                                                                                            | L sylvian<br>aracnoid cyst                                                                                                                                 | lymphocytic pleocytosis (22<br>lymphocytes/mm <sup>3</sup> , 15<br>mononuclear<br>leucocytes/mm <sup>3</sup> ), high<br>protein content.<br>VDRL and FTA-ABS<br>positive.                                                         | CBZ, PHT<br>and<br>anesthesia | RSE             | severe<br>disability:<br>aphasia,<br>ataxia,<br>epilepsy |

|                        |   |     |     |                                                                 |     |     |     |                          |                                                             |                                                                                                                                                                                                                                                    |                         |              |                                                                                       |
|------------------------|---|-----|-----|-----------------------------------------------------------------|-----|-----|-----|--------------------------|-------------------------------------------------------------|----------------------------------------------------------------------------------------------------------------------------------------------------------------------------------------------------------------------------------------------------|-------------------------|--------------|---------------------------------------------------------------------------------------|
| Otto et al., 2007      | 1 | M   | 29  | Headache, vertigo and anorexia then TC seizure then NCSE (CPSE) | yes | yes | no  | L T paroxysms            | L mesio-T and thalamus hyperintensities                     | 90 cells/ $\mu$ L, prevalence of lymphomonocytic cell, Erythrocytes 40/ $\mu$ L, total protein 1.85 mg/L, lactate 2.06 mmol/L, glucose 76 mg/dL. Bacteria and HSV negative. TPHA: 1:131.072, VDRL 1:16, CSF-serum antibody index (62.14, norm < 3) | VPA, LEV, PHT, MZM, PRO | RSE          | severe disability: possible the tracheotomy decannulation                             |
| Amare et al., 2008     | 2 | N/R | N/R | N/R                                                             | N/R | N/R | yes | N/R                      | N/R                                                         | VDRL positive                                                                                                                                                                                                                                      | N/R                     | N/R          | deceased                                                                              |
| Sinha et al., 2008     | 5 | N/R | N/R | CSE                                                             | yes | yes | N/R | N/R                      | N/R                                                         | VDRL positive                                                                                                                                                                                                                                      | N/R                     | N/R          | N/R                                                                                   |
| Sesar et al., 2008     | 1 | M   | 57  | memory impairment and previous GTCS. NCSE (CPSE)                | no  | yes | N/R | L T paroxysms            | hyperintensity in both L F-T lobes                          | 30 leukocytes (predominantly polymorphonuclear), 160 mg/dL proteins; glucose normal. VDRL 1/4, TPHA 1/320, FTA Abs IgG+++. HSV negative.                                                                                                           | DZP, VPA                | Reponsive SE | severe disability: aphasia, right hemiparesis and severe short-term memory impairment |
| Hajjaj et al., 2010    | 1 | M   | 49  | siphilitic chancre. SE                                          | yes | no  | N/R | bi-frontal TW            | diffuse edema                                               | Syphilitic tests positive                                                                                                                                                                                                                          | CBZ                     | Reponsive SE | Complete recover with total seizures remission                                        |
| Kuppasani et al., 2010 | 1 | M   | 33  | GCSE                                                            | yes | yes | no  | LPDs (focus N/R)         | hyperintensity of the L FT regions and bilateral hippocampi | WBC: 207/ $\mu$ L, protein: 89 mg/dL, VDRL: positive. and negative HSV.                                                                                                                                                                            | LZP, PHT                | Reponsive SE | Improve ment                                                                          |
| Gaud et al., 2011      | 1 | M   | 55  | confusional state, NCSE (CPSE)                                  | yes | yes | N/R | L T infraclonic seizures | L amigdalohippocampal and T-polar hyperintensity            | Lymphocytic pleocytosis (15 cellules), high protein content: 0.59 g/L. VDRL 1:2, TPHA 1:256. anti-VGKC, anti-NMDA negative                                                                                                                         | LEV                     | Reponsive SE | Recovery                                                                              |

|                       |   |     |     |                                                                       |     |     |     |          |                                                                   |                                                                                                                                                                                                                                                                                                                                   |                                  |              |                                               |
|-----------------------|---|-----|-----|-----------------------------------------------------------------------|-----|-----|-----|----------|-------------------------------------------------------------------|-----------------------------------------------------------------------------------------------------------------------------------------------------------------------------------------------------------------------------------------------------------------------------------------------------------------------------------|----------------------------------|--------------|-----------------------------------------------|
| Yao et al., 2012      | 1 | M   | 42  | psychotic symptoms, cognitive alterations then FMSE                   | yes | yes | no  | N/R      | cerebral edema and hyperintensity of the R PTO lobes and thalamus | Opening pressure: 156 mmH <sub>2</sub> O. WBC 38 x10 <sup>6</sup> /L: Lymphocytic pleocytosis (lymphocytes 70%, mononuclear cells 25%, neutrophils 5%), high protein content 0.8 g/L, normal glucose, chloride, adenosine deaminase and lactic acid. LDH 29 U/L, CRP 0.1 mg/L. Acid-fast, Gram and Indian ink staining: negative. | VPA                              | Reponsive SE | Complete recovery, seizures free              |
| Derouich et al., 2013 | 1 | M   | 50  | GCSE and limbic encephalitis                                          | yes | yes | no  | ED bi-FT | bi-T-mesial hyperintensities                                      | 32 WBC (95% Lymphocytic), hypoglycorrachia 0.68 g/l, hyperproteinorrachia 0.83 g/l, negative HSV, VDRL positive.                                                                                                                                                                                                                  | PB, VPA, BDZ                     | Reponsive SE | Improve ment of neuro-psycholog ical symptoms |
| Tong et al., 2013     | 4 | M   | 39  | CPSG                                                                  | yes | yes | N/R | N/R      | N/R                                                               | N/R                                                                                                                                                                                                                                                                                                                               | N/R                              | N/R          | N/R                                           |
|                       |   | F   | 50  | Epilepsy then CPSG                                                    | no  | yes | N/R | N/R      | N/R                                                               | N/R                                                                                                                                                                                                                                                                                                                               | N/R                              | N/R          | N/R                                           |
|                       |   | F   | 44  | Epilepsy then CPSG                                                    | no  | yes | N/R | N/R      | N/R                                                               | N/R                                                                                                                                                                                                                                                                                                                               | N/R                              | N/R          | N/R                                           |
|                       |   | F   | 60  | CPSG                                                                  | yes | yes | N/R | N/R      | N/R                                                               | N/R                                                                                                                                                                                                                                                                                                                               | N/R                              | N/R          | N/R                                           |
| Lv et al., 2014       | 1 | M   | 59  | 20 days progressive cognitive decline and abnormal behavior then NCSE | yes | yes | N/R | R F LPDs | Mild R FT atrophy and "lace sign" bilateral FPTO                  | 4 cells, raised protein (51 mg/d)L, normal glucose (55 mg/dL). VDRL positive.                                                                                                                                                                                                                                                     | DZP                              | Reponsive SE | improvement: at 3 months MMSE 24/30           |
| Gaspard et al., 2015  | 1 | N/R | N/R | N/R                                                                   | N/R | N/R | N/R | N/R      | N/R                                                               | N/R                                                                                                                                                                                                                                                                                                                               | N/R                              | N/R          | N/R                                           |
| Kumari et al., 2015   | 1 | M   | 31  | 3 years before genital syphilis.                                      | yes | no  | no  | N/R      | hyperintensity in the anterior L T lobe                           | Raised protein: 1.36 g/L, 10 mononuclear cells x10 <sup>6</sup> /L, RBC 2, glucose level/serum glucose level (4.2/10.2), no                                                                                                                                                                                                       | PHT, (other 3 unspecified AEDs), | SRSE         | severe disability: gross functional deficits  |

|                             |          |          |           |                                                               |            |            |           |                                        |                                  |                                                                                                                                                                                                                     |                                     |               |                                                                              |
|-----------------------------|----------|----------|-----------|---------------------------------------------------------------|------------|------------|-----------|----------------------------------------|----------------------------------|---------------------------------------------------------------------------------------------------------------------------------------------------------------------------------------------------------------------|-------------------------------------|---------------|------------------------------------------------------------------------------|
|                             |          |          |           | Weight loss, malaise and SE                                   |            |            |           |                                        |                                  | organisms on Gram stain, TB, cryptococcus and virus negative. RPR 1:4, TPPA 1:10.240                                                                                                                                | MZM, PRO, steroids                  |               | and marked cognitive impairment                                              |
| Ahn S-J et al., 2016        | 1        | M        | 29        | 3 months history of memory disturbances and aphasia then NCSE | yes        | yes        | N/R       | L TO LPDs                              | L thalamic and TO hyperintensity | Opening pressure 150 mmH <sub>2</sub> O, WBC 60/μL (lymphocytes 60%), RBC 20/μL, protein 187 mg/dL, glucose 69 mg/dL VDRL 1:32. Virus, culture tests for HSV, CMV, EBV, bacteria, tuberculosis, and fungal negative | CBZ, LEV                            | Reponsive SE  | Improve ment: cognitive sequelae (aphasia, memory impairment and MMSE: 9/30) |
| Yu et al., 2016             | 1        | M        | 56        | history of syphilis; cognitive decline then NCSE              | yes        | no         | N/R       | Left hemispheric LPDs                  | bi-TO hyperintensity             | 77 leukocytes (14.3% lymphocyte, 86.7% monocytes), protein (84 mg/dL), glucose (47 mg/dL). Negative bacterial or fungal culture. 14-3-3 protein (+), VDRL 1:8, TRUST 1:4 and TPPA positive.                         | DZP, LEV                            | Reponsive SE  | Improve ment with cognitive sequelae                                         |
| Sakai et al., 2018          | 1        | M        | 33        | epilepsy, anisocoria and cognitive impairment then GCSE       | no         | yes        | no        | R FC slow waves at 3-Hz and R O spikes | R F and T hyperintensity         | RPR and TPHA positive. Mild pleocytosis (48 cells/ul) with predominant lymphocytes (96%) and increased protein (81 mg/dl). IgG index: 2.22.                                                                         | DZP, PHT, LEV                       | Responsive SE | Improve ment with cognitive sequelae                                         |
| Todou-Daouda M et al., 2018 | 1        | M        | 41        | GCSE                                                          | yes        | yes        | no        | N/R                                    | hyperintensity in the R TI       | N/R                                                                                                                                                                                                                 | N/R                                 | N/R           | N/R                                                                          |
| <b>Present case</b>         | <b>1</b> | <b>M</b> | <b>55</b> | <b>NCSE</b>                                                   | <b>yes</b> | <b>yes</b> | <b>no</b> | <b>R FT seizures</b>                   | <b>diffuse atrophy</b>           | <b>2 cells/ul, mild proteins increment (93 mg/dl); viral PCR and bacteria negative, 30 intrathecal oligoclonal bands. VDRL</b>                                                                                      | <b>DZP, VPA, LCM, PRO, KET, MZM</b> | <b>SRSE</b>   | <b>Complete recovery</b>                                                     |

|  |  |  |  |  |  |  |  |  |  |                                       |  |  |  |
|--|--|--|--|--|--|--|--|--|--|---------------------------------------|--|--|--|
|  |  |  |  |  |  |  |  |  |  | <b>1:32, TPHA 1:5120, RPR<br/>1:4</b> |  |  |  |
|--|--|--|--|--|--|--|--|--|--|---------------------------------------|--|--|--|

SE: Status Epilepticus; CSE: Convulsive Status Epilepticus; NCSE: Non Convulsive Status Epilepticus; TC: tonic-clonic; GTCS: generalized Tonic-clonic Seizure; CPSE: Complex Partial Status Epilepticus; FMSE: Focal Motor Status Epilepticus; GCSE: Generalized Convulsive Status Epilepticus; CPSG: Complex Partial Secondary Generalized; R: right; L: left; F: frontal; FC: Fronto-Central; T: temporal; TI: Temporo-Insular; P: parietal; O: occipital; ED: epileptiform discharges; LPDs: Lateralized Epileptiform Discharges; TW: triphasic waves; RSE: Refractory Status Epilepticus; SRSE: Super-Refractory Status Epilepticus; AEDs: antiepileptic drugs; BDZ: Benzodiazepines; DZP: Diazepam; CLZ: Clonazepam; LZP: Lorazepam; PB: Phenobarbital; PHT: Phenytoin; VPA: Valproic Acid; LTG: Lamotrigine; CBZ: Carbamazepine; LEV: Levetiracetam; LCM: Lacosamide; MZM: Midazolam; PRO: Propofol; KET: Ketamine; FTD: Fronto-Temporal Dementia; WBC: White Blood Cells; RBC: Red Blood Cells; VDRL: Venereal Disease Research Laboratory; TPHA: Treponema Pallidum Haemagglutination Assay; TPPA: Treponema Pallidum Particle agglutination Assay; FTA-ABS: Fluorescent-Treponemal-Antibody Absorption test; TRUST: Tolidine Red Unheated Serum Test; RPR: Rapid Plasma Reagin; HSV: Herpes Simplex Virus; PMN: polymorphonuclear; TB: tuberculosis; N/R: Not Reported.



**Supplementary table 2.** Demographic, clinical, EEG, MRI, CSF and follow-up characteristics of neurosyphilitic patients presenting Status Epilepticus after antibiotic treatment initiation as an expression Jarisch-Herxheimer Reaction.

| Study                  | N of patients | Gender | Age | Clinical Presentation                                                                                                                      | New onset SE | Syphilis diagnosed at SE presentation | Immuno-compromised | EEG                                     | Neuroimaging                                                                     | CSF                                                                                                                               | SE Treatment  | Response      | Outcome                                                                |
|------------------------|---------------|--------|-----|--------------------------------------------------------------------------------------------------------------------------------------------|--------------|---------------------------------------|--------------------|-----------------------------------------|----------------------------------------------------------------------------------|-----------------------------------------------------------------------------------------------------------------------------------|---------------|---------------|------------------------------------------------------------------------|
| Zifko et al., 1994     | 1             | M      | 40  | Progressive personality changes, memory impairment and previous history of primary syphilis, then NCSE 10 hours after treatment initiation | yes          | no                                    | no                 | 3 Hz Generalised abnormalities and LPDs | hypeintensities of the WM of F lobes, F atrophy                                  | 24/mm <sup>2</sup> cells, high protein level (1.56 g/l), VDRL 1:1                                                                 | DZP           | N/R           | Recovery                                                               |
| Kojan et al., 2000     | 1             | M      | 55  | Progressive dementia. Two focal seizures to bilateral TC then NCSE 14 hours after treatment initiation                                     | yes          | yes                                   | no                 | R emispheric ED and LPD                 | diffuse atrophy                                                                  | lymphocytic pleocytosis (WBCs 24/mm <sup>3</sup> , 96% lymphocytes) and high total protein (0.74 g/L). VDRL 1:8; MHA-TP positive. | PHT           | Responsive SE | severe disability: persistent severe dementia and epilepsy development |
| Gurses et al., 2007    | 1             | F      | 71  | impaired memory and walking difficulties (rigidity and ataxic gait). NCSE 12 hours after treatment initiation                              | yes          | yes                                   | no                 | R FT LPDs                               | diffuse atrophy and leukoaraiosis                                                | high protein level (156 mg/dL) and mild lymphocytic pleocytosis (28/mm <sup>3</sup> ), VDRL and TPHA positive.                    | PHT           | Responsive SE | severe disability: persistent gait difficulties                        |
| Kobayashi et al., 2011 | 1             | M      | 48  | epilepsy, hemianopia, cerebellar ataxia, anisocoria, impaired memory and                                                                   | no           | yes                                   | no                 | N/R                                     | hyperintense lesions in the F, T, PO lobes, corpus callosum; and cingulate gyrus | WBC: 26/mm <sup>3</sup> , elevated total protein levels (70 mg/dL). No atypical cells. RPR 1:8, FTA-ABS 1:1,024.                  | CBZ, steroids | Responsive SE | Improvement                                                            |

|                       |   |   |    |                                                                         |     |     |     |                                       |        |                                                         |               |      |                   |
|-----------------------|---|---|----|-------------------------------------------------------------------------|-----|-----|-----|---------------------------------------|--------|---------------------------------------------------------|---------------|------|-------------------|
|                       |   |   |    | attention. NCSE (CPSE) after treatment initiation                       |     |     |     |                                       |        |                                                         |               |      |                   |
| Rissardo et al., 2019 | 1 | M | 23 | Behavioral and blurred vision, GCSE 12 hours after treatment initiation | yes | yes | N/R | LPDs and generalized spikes and waves | Normal | WBC 28 mm <sup>3</sup> , protein 239.7 mg/dl, VDRL 1:16 | MZM, PHT, PRO | SRSE | Severe disability |

SE: Status Epilepticus; CSE: Convulsive Status Epilepticus; NCSE: Non Convulsive Status Epilepticus; TC: tonic-clonic; GTCS: generalized Tonic-clonic Seizure; CPSE: Complex Partial Status Epilepticus; FMSE: Focal Motor Status Epilepticus; GCSE: Generalized Convulsive Status Epilepticus; CPSG: Complex Partial Secondary Generalized; R: right; L: left; F: frontal; FC: Fronto-Central; T: temporal; TI: Temporo-Insular; P: parietal; O: occipital; ED: epileptiform discharges; LPDs: Lateralized Epileptiform Discharges; TW: triphasic waves; RSE: Refractory Status Epilepticus; SRSE: Super-Refractory Status Epilepticus; AEDs: antiepileptic drugs; BDZ: Benzodiazepines; DZP: Diazepam; CLZ: Clonazepam; LZP: Lorazepam; PB: Phenobarbital; PHT: Phenitoin; VPA: Valproic Acid; LTG: Lamotrigine; CBZ: Carbamazepine; LEV: Levetiracetam; LCM: Lacosamide; MZM: Midazolam; PRO: Propofol; KET: Ketaomine; FTD: Fronto-Temporal Dementia; WBC: White Blood Cells; VDRL: Veneral Disease Research Laboratory; MHA-TP: Microhemagglutination Assay for Treponema pallidum Antibodies; TPHA: Treponema Pallidum Haemagglutination Assay; FTA-Abs: Fluorescent-Treponemal-Antibody Absorption test; RPR: Rapid Plasma Reagin; N/R: Not Reported.
